# Supplementary material for: Non-enzymatic electrochemical detection of glucose using Ni–Cu bimetallic alloy nanoparticles loaded on reduced graphene oxide through a one-step synthesis strategy
Source: Royal Society of Chemistry journal article supplement (doi:10.1039/d1ay01357b), 2021-01-01
Supplement: d1ay01357b1.pdf [file d1ay01357b1.pdf]

## Supplementary Information

### **Non-enzymatic Electrochemical Detection of Glucose Using Ni-Cu Bimetallic Alloy Nanoparticles Loaded on Reduced Graphene Oxide through One-step Synthesis Strategy**

Xiaoyun Xu<sup>a</sup>, Rong Tan<sup>b</sup>, Xiaoyi Lv<sup>a</sup>, Chao Geng<sup>a</sup>, Yanping Li<sup>a</sup>, Bo Cui<sup>a</sup>, Yishan Fang<sup>a,\*</sup>

<sup>a</sup> State Key Laboratory of Biobased Material and Green Papermaking, School of Food Science and Engineering, Qilu University of Technology, Shandong Academy of Sciences, Jinan, 250353, China.

<sup>b</sup> College of Science, Huzhou University, Zhejiang, Huzhou, 313000, China.

Tel. /fax: +86 0531 89631195 (Y. Fang)

E-mail address: fangysh123@qlu.edu.cn (Y. Fang)

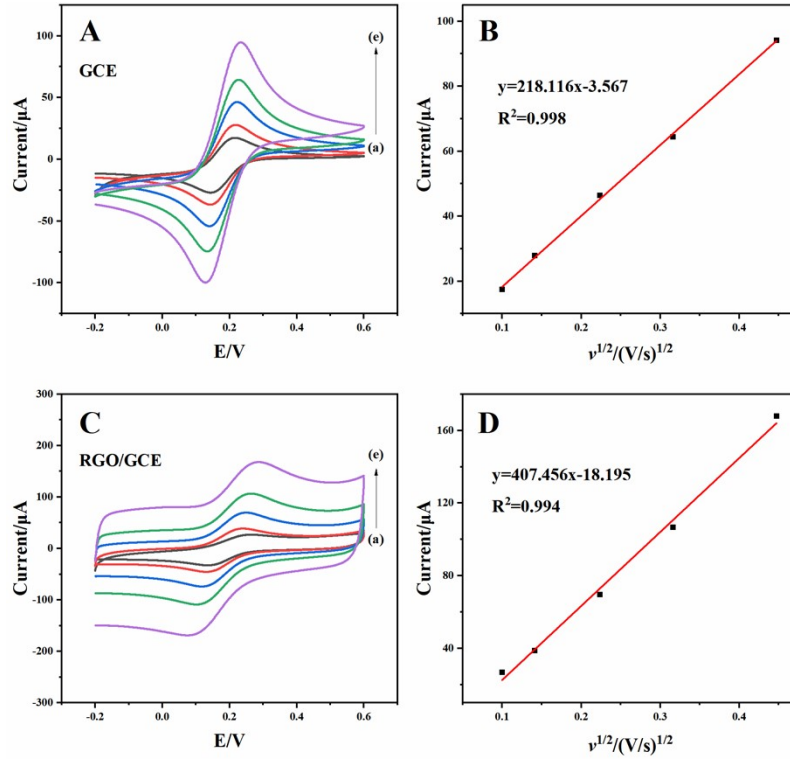

**Figure S1.** (A) CV curves of bare GCE in 0.1 M KCl containing 5 mM  $K_3[Fe(CN)_6]$  at different scan rates (from a-e: 0.01–0.2 V/s). (B) Corresponding calibration curve of GCE at different scan rates. (C) CV curves of RGO/GCE in 0.1 M KCl containing 5 mM  $K_3[Fe(CN)_6]$  at different scan rates (from a-e: 0.01–0.2 V/s). (D) Corresponding calibration curve of RGO/GCE at different scan rates.
